# Supplementary material for: Synovial fluid lubricin increases in spontaneous canine cruciate ligament rupture
Source: PubMed Central journal article supplement (PMC7542452; doi:10.1038/s41598-020-73270-2), 2020-10-07
Supplement: 41598_2020_73270_MOESM1_ESM.pdf [file 41598_2020_73270_MOESM1_ESM.pdf]

# **Synovial Fluid Lubricin Increases in Spontaneous Canine Cruciate Ligament Rupture**

Yuyan Wang<sup>1, 2†</sup>, David W. Gludish<sup>1†</sup>, Kei Hayashi<sup>1</sup>, Rory J. Todhunter<sup>1</sup>, Ursula Krotscheck<sup>1</sup>,  
Philippa J. Johnson<sup>1</sup>, Bethany P. Cummings<sup>3</sup>, Jin Su<sup>1</sup>, Heidi L. Reesink<sup>1\*</sup>

<sup>1</sup>Department of Clinical Sciences, College of Veterinary Medicine, Cornell University, Ithaca, NY

<sup>2</sup>Meinig School of Biomedical Engineering, Cornell University, Ithaca, NY

<sup>3</sup>Department of Biomedical Sciences, Cornell University, Ithaca, NY

†Both authors contributed equally to this manuscript

**\*Please Address Correspondence to:**

Heidi Reesink VMD PhD

Cornell University College of Veterinary Medicine

VMC C3-101

Ithaca, NY 14853

Phone: 607-253-3100

Email: [hlr42@cornell.edu](mailto:hlr42@cornell.edu)

### Global OA Score

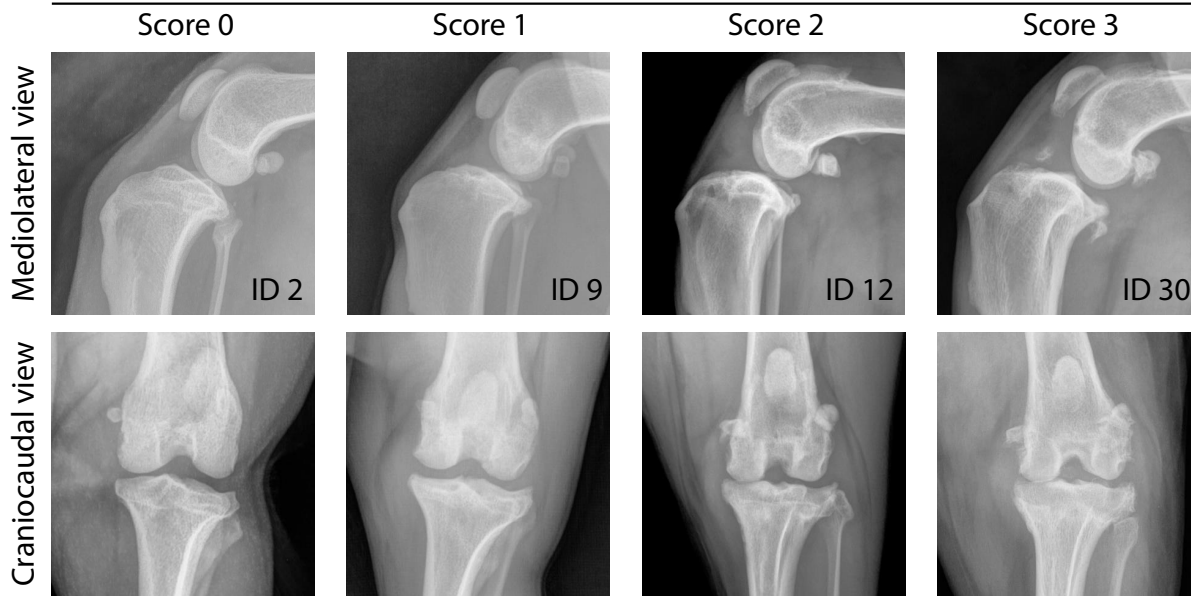

### Intra-articular mineralization

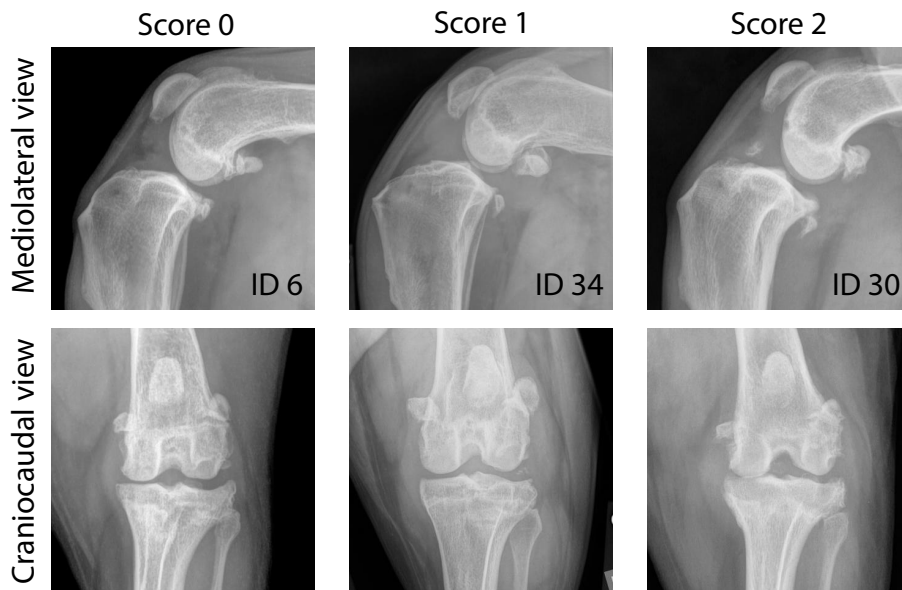

### Caudal tibial shelf

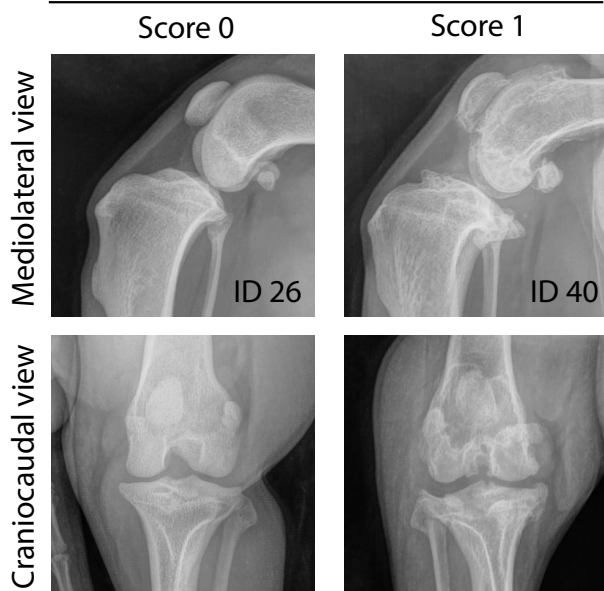

### Supplemental Figure 1.

Paired mediolateral and craniocaudal radiographs from individual canine patients representing the range of possible scores for: global OA (0-3), intra-articular mineralization (0-3) and caudal tibial shelf (0-1).

|                                       | <b>PJ vs. HR</b> | <b>HR vs. DG</b> | <b>PJ vs. DG</b> |
|---------------------------------------|------------------|------------------|------------------|
| <b>Global OA score</b>                | 0.659            | 0.674            | 0.312            |
| <b>Joint effusion</b>                 | 0.736            | 0.567            | 0.502            |
| <b>Osteophytosis</b>                  | 0.712            | 0.712            | 0.700            |
| <b>Intra-articular mineralization</b> | 0.493            | 0.396            | 0.393            |
| <b>Medial buttress</b>                | 0.433            | 0.570            | 0.474            |
| <b>Caudal tibial shelf</b>            | 0.692            | 0.665            | 0.479            |

**Supplemental Table 1.** Linear weighted Kappa interrater agreement for canine radiographic osteoarthritis scoring. Strength of agreement was interpreted with kappa values: 0-0.2 being poor, 0.21-0.40 being fair, 0.41-0.60 being moderate, 0.61-0.80 being good, and 0.81-1.00 being very good for interrater agreement between scores for three co-authors, including the second (DG), sixth (PJ) and final co-author (HR).

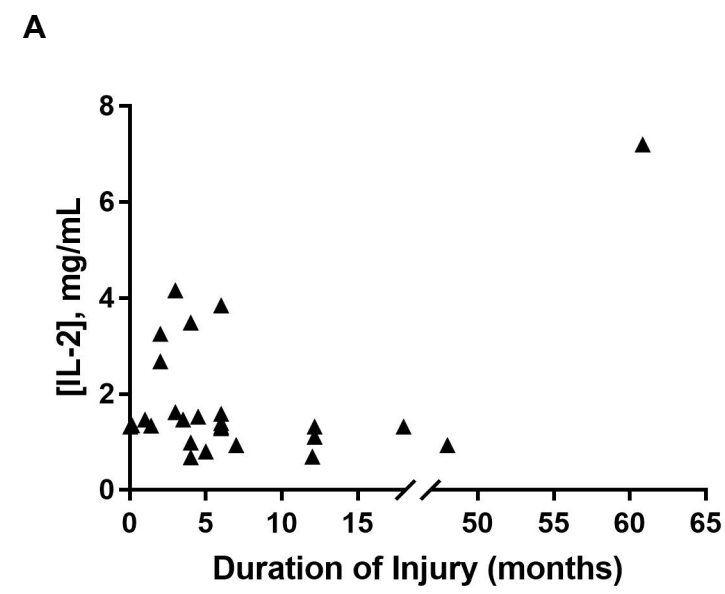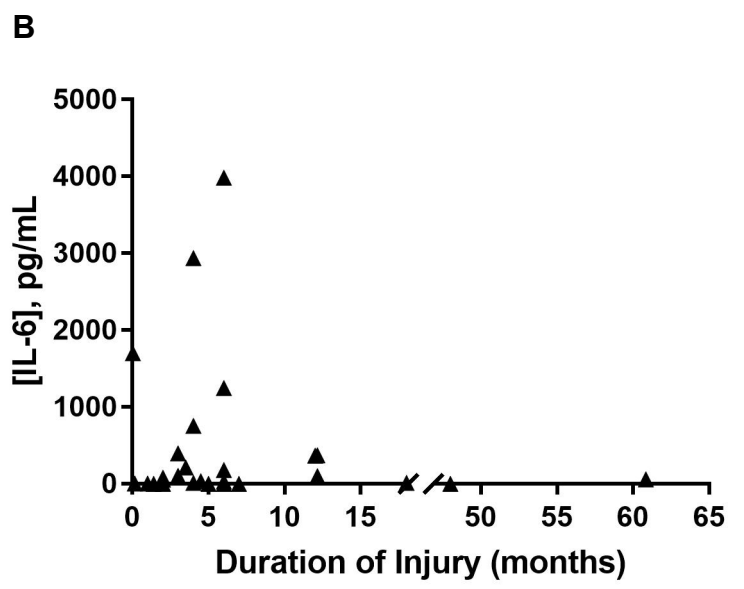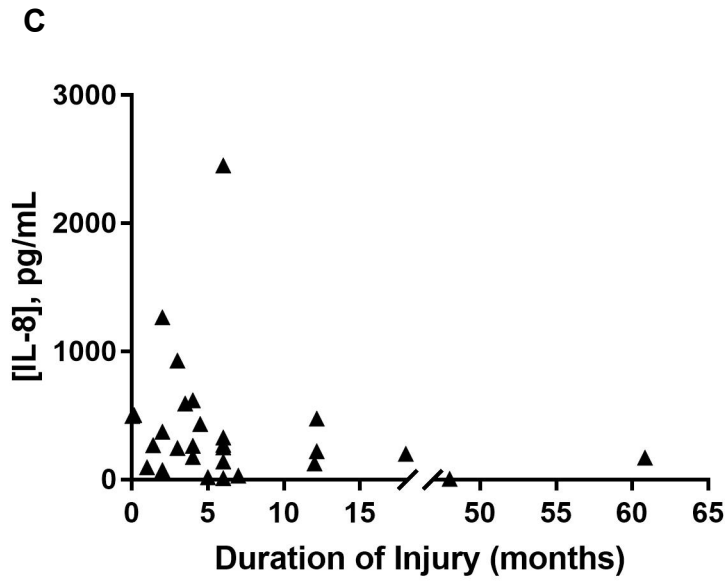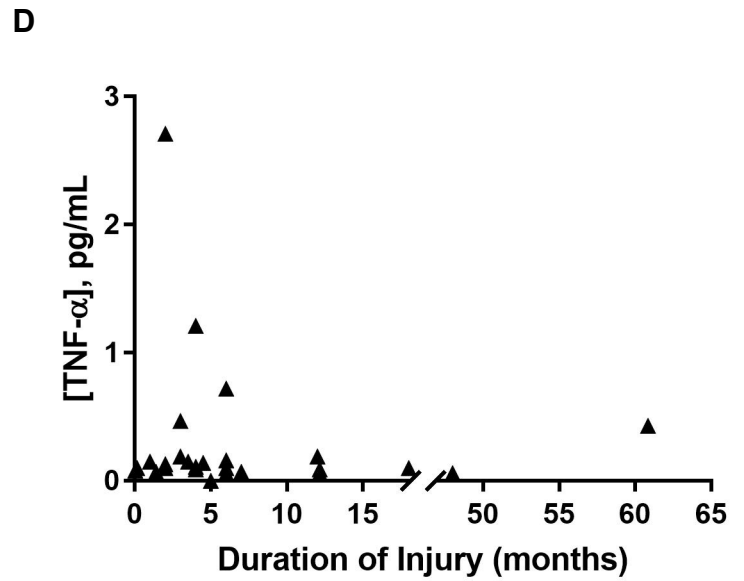

**Supplemental Figure 2.** Synovial fluid A) IL-2, B) IL-6, C) IL-8, and D) TNF- $\alpha$  concentrations plotted as a function of injury duration in dogs with RCCL (n = 28).

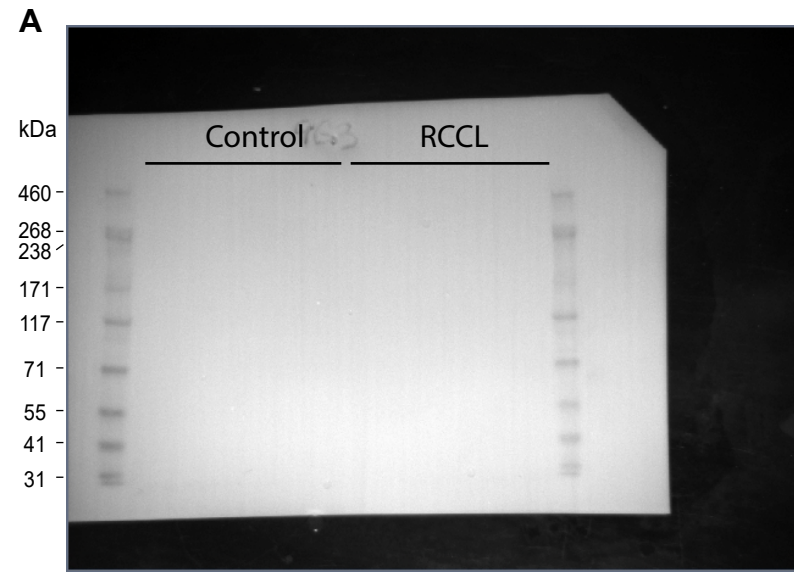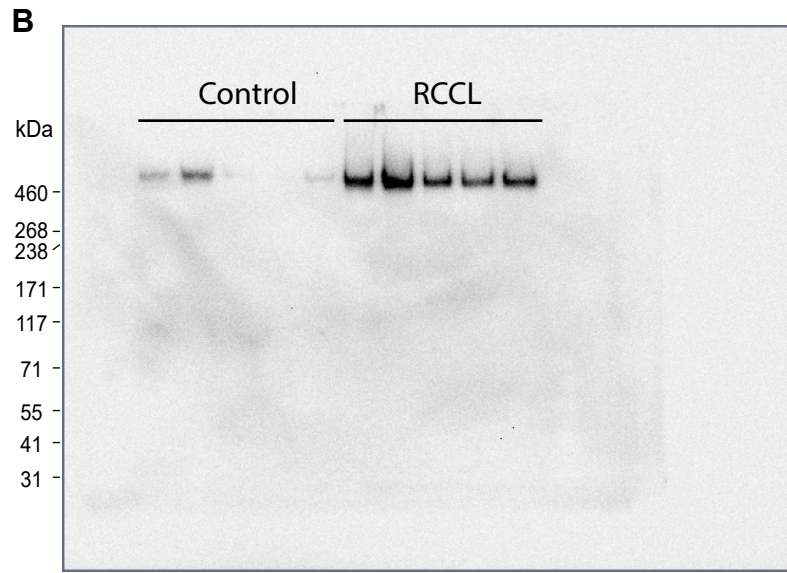

**Supplemental Figure 3.** Anti-lubricin western blots of synovial fluid from 5 randomly selected control and RCCL dogs. A) Bright field image of standard ladders (HiMark™ Pre-stained Protein Standard, cat. #LC5699, Invitrogen), 5  $\mu$ L/lane, B) chemiluminescence, exposure time: 15 s; sample loaded: 10  $\mu$ L/lane.

| <b>Cytokine/Chemokine</b> | <b>Lubricin</b> | <b>Duration of Injury</b> |
|---------------------------|-----------------|---------------------------|
| IL-2                      | -0.23 (n.s.)    | -0.31 (n.s.)              |
| IL-6                      | -0.24 (n.s.)    | -0.02 (n.s.)              |
| IL-8                      | -0.11 (n.s.)    | -0.39 (n.s.)              |
| TNF- $\alpha$             | -0.25 (n.s.)    | -0.17 (n.s.)              |

**Supplemental Table 2.** Correlation of inflammatory cytokine/chemokine concentrations, lubricin concentrations and injury duration in dogs with RCCL (n = 28). Data reported as Spearman's  $\rho$ , n.s.: not significant, Spearman's test,  $\alpha = 0.05$ .

|                           | <b>Control</b>                | <b>RCCL</b>                                                                                                                                                                                                                                                                    |
|---------------------------|-------------------------------|--------------------------------------------------------------------------------------------------------------------------------------------------------------------------------------------------------------------------------------------------------------------------------|
| <b>Number</b>             | N = 9                         | N = 30                                                                                                                                                                                                                                                                         |
| <b>Age</b>                | 3.3 - 7.6 yrs, mean = 5.5 yrs | 2.6 – 11.0 yrs, mean = 6.2 yrs                                                                                                                                                                                                                                                 |
| <b>Sex</b>                | Intact male                   | 13 neutered male<br>14 spayed female<br>2 intact male<br>1 intact female                                                                                                                                                                                                       |
| <b>Breed</b>              | Beagle                        | 1 Bernese Mountain Dog<br>1 Boxer<br>1 Bulldog, English<br>1 Cane Corso<br>2 English Springer Spaniel<br>1 German Shepherd<br>3 Golden Retriever<br>9 Labrador Retriever<br>1 Mastiff<br>6 Mixed Dog<br>1 Pembroke Welsh Corgi<br>2 Rottweiler<br>2 Staffordshire Bull Terrier |
| <b>Duration of injury</b> | N/A                           | 0 - 60.8 months, mean = 8.4 months                                                                                                                                                                                                                                             |

**Supplemental Table 3.** Demographics of the RCCL and control groups
